# Supplementary material
Source: Springer Nature journal article supplement (https://www.springermedizin.de/resource/supplementary/12879_2012_2192_MOESM2_ESM.pdf/9444580)

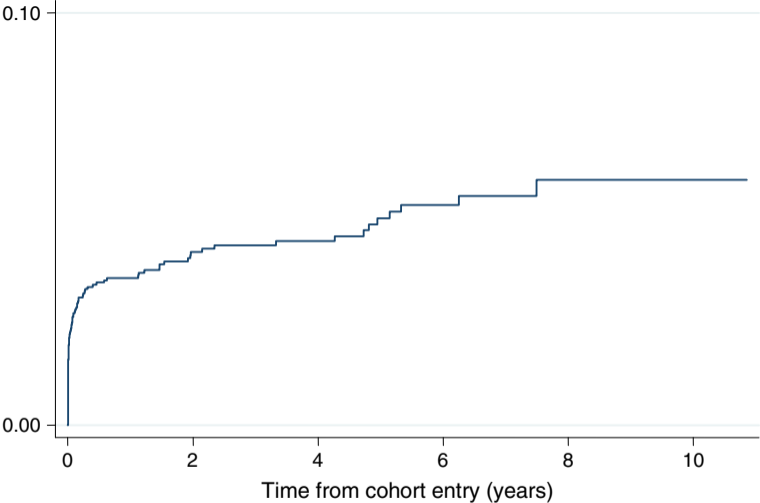

Patients at risk:

2341

1261

839

474

189

15

Supplement: MOESM2 [file 9444580]
